# Supplementary material for: In situ synthesis of [Cu(BODN)·5H2O]n@nano-Al composite energetic films with tunable properties in pyro-MEMS
Source: Royal Society of Chemistry journal article supplement (doi:10.1039/d3lc00282a), 2023-01-01
Supplement: d3lc00282a1.pdf [file d3lc00282a1.pdf]

## **Electronic Supplementary Information**

### ***In situ* synthesis of [Cu(BODN)·5H<sub>2</sub>O]<sub>n</sub>@nano-Al composite energetic films with tunable properties in pyro-MEMS**

Wei Liu, Yongan Feng, Yapeng Yao, Zihang Liang, Fei Xiao, Zhongliang Ma \*

School of Environmental and Safety Engineering, North University of China, Taiyuan,  
Shanxi, China

\* Corresponding authors. E-mail address: mazhongliang@nuc.edu.cn (Z. Ma).

1. Schematic diagram for preparing  $[\text{Cu}(\text{BODN})\cdot 5\text{H}_2\text{O}]_n$  single crystal

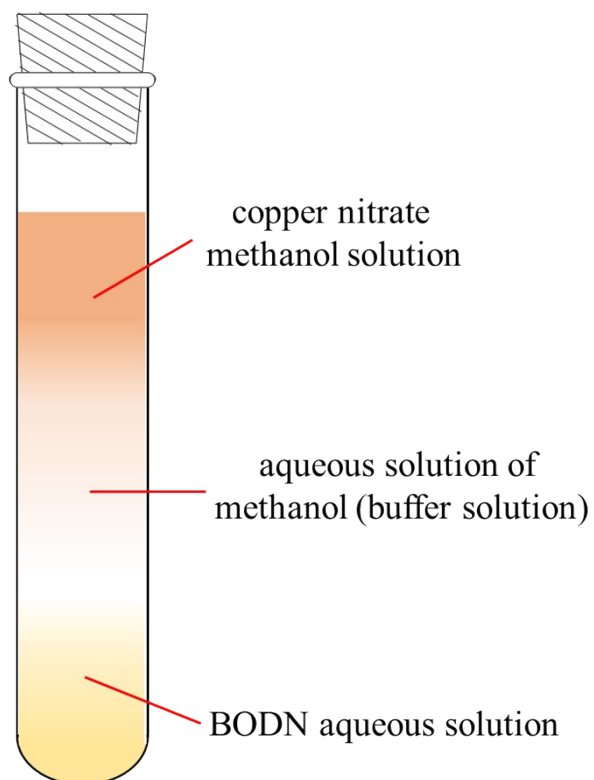

Fig. S1 Schematic diagram for preparing  $[\text{Cu}(\text{BODN})\cdot 5\text{H}_2\text{O}]_n$  single crystal by liquid-phase diffusion method

## 2. Single-crystal X-ray Diffraction Analysis of [Cu(BODN)·5H<sub>2</sub>O]<sub>n</sub>

Table S1 Selected bond lengths [Å] of [Cu(BODN)·5H<sub>2</sub>O]<sub>n</sub>

| Atom            | Atom             | Length/Å | Atom           | Atom           | Length/Å |
|-----------------|------------------|----------|----------------|----------------|----------|
| Cu <sup>1</sup> | O <sup>3</sup>   | 1.992(2) | N <sup>6</sup> | C <sup>4</sup> | 1.314(4) |
| Cu <sup>1</sup> | O <sup>4</sup>   | 1.971(2) | O <sup>2</sup> | N <sup>8</sup> | 1.228(4) |
| Cu <sup>1</sup> | O <sup>111</sup> | 2.310(3) | N <sup>5</sup> | C <sup>3</sup> | 1.282(4) |
| Cu <sup>1</sup> | N <sup>6</sup>   | 1.986(3) | N <sup>3</sup> | N <sup>4</sup> | 1.403(4) |
| Cu <sup>1</sup> | N <sup>31</sup>  | 1.980(3) | N <sup>3</sup> | C <sup>1</sup> | 1.315(4) |
| Cu <sup>1</sup> | O <sup>1</sup>   | 2.261(3) | O <sup>1</sup> | N <sup>8</sup> | 1.245(4) |
| O <sup>9</sup>  | C <sup>1</sup>   | 1.367(4) | N <sup>4</sup> | C <sup>2</sup> | 1.281(4) |
| O <sup>9</sup>  | C <sup>2</sup>   | 1.353(4) | N <sup>7</sup> | N <sup>8</sup> | 1.342(3) |
| O <sup>5</sup>  | C <sup>4</sup>   | 1.371(4) | N <sup>7</sup> | C <sup>4</sup> | 1.340(4) |
| O <sup>5</sup>  | C <sup>3</sup>   | 1.357(4) | N <sup>1</sup> | N <sup>2</sup> | 1.338(4) |
| O <sup>11</sup> | N <sup>1</sup>   | 1.251(4) | N <sup>2</sup> | C <sup>1</sup> | 1.343(4) |
| O <sup>10</sup> | N <sup>1</sup>   | 1.238(4) | C <sup>3</sup> | C <sup>2</sup> | 1.446(4) |
| N <sup>6</sup>  | N <sup>5</sup>   | 1.401(4) |                |                |          |

Table S2 Selected bond angles [°] of [Cu(BODN)·5H<sub>2</sub>O]<sub>n</sub>

| Atom            | Atom            | Atom             | Angle/°    | Atom            | Atom           | Atom            | Angle/°  |
|-----------------|-----------------|------------------|------------|-----------------|----------------|-----------------|----------|
| O <sup>3</sup>  | Cu <sup>1</sup> | O <sup>111</sup> | 90.19(10)  | C <sup>1</sup>  | N <sup>3</sup> | N <sup>4</sup>  | 107.7(2) |
| O <sup>3</sup>  | Cu <sup>1</sup> | O <sup>1</sup>   | 92.05(11)  | N <sup>8</sup>  | O <sup>1</sup> | Cu <sup>1</sup> | 135.8(2) |
| O <sup>4</sup>  | Cu <sup>1</sup> | O <sup>3</sup>   | 178.63(11) | C <sup>2</sup>  | N <sup>4</sup> | N <sup>3</sup>  | 104.6(3) |
| O <sup>4</sup>  | Cu <sup>1</sup> | O <sup>111</sup> | 88.60(10)  | C <sup>4</sup>  | N <sup>7</sup> | N <sup>8</sup>  | 116.1(3) |
| O <sup>4</sup>  | Cu <sup>1</sup> | N <sup>6</sup>   | 89.25(10)  | O <sup>2</sup>  | N <sup>8</sup> | O <sup>1</sup>  | 120.0(3) |
| O <sup>4</sup>  | Cu <sup>1</sup> | N <sup>31</sup>  | 90.48(10)  | O <sup>2</sup>  | N <sup>8</sup> | N <sup>7</sup>  | 116.7(3) |
| O <sup>4</sup>  | Cu <sup>1</sup> | O <sup>1</sup>   | 89.18(11)  | O <sup>1</sup>  | N <sup>8</sup> | N <sup>7</sup>  | 123.2(3) |
| N <sup>6</sup>  | Cu <sup>1</sup> | O <sup>3</sup>   | 90.44(10)  | O <sup>11</sup> | N <sup>1</sup> | N <sup>2</sup>  | 123.5(3) |
| N <sup>6</sup>  | Cu <sup>1</sup> | O <sup>111</sup> | 104.76(10) | O <sup>10</sup> | N <sup>1</sup> | O <sup>11</sup> | 120.5(3) |
| N <sup>6</sup>  | Cu <sup>1</sup> | O <sup>1</sup>   | 77.15(10)  | O <sup>10</sup> | N <sup>1</sup> | N <sup>2</sup>  | 116.0(3) |
| N <sup>31</sup> | Cu <sup>1</sup> | O <sup>3</sup>   | 89.87(10)  | N <sup>1</sup>  | N <sup>2</sup> | C <sup>1</sup>  | 116.6(3) |
| N <sup>31</sup> | Cu <sup>1</sup> | O <sup>111</sup> | 76.96(10)  | N <sup>6</sup>  | C <sup>4</sup> | O <sup>5</sup>  | 110.2(3) |
| N <sup>31</sup> | Cu <sup>1</sup> | N <sup>6</sup>   | 178.26(12) | N <sup>6</sup>  | C <sup>4</sup> | N <sup>7</sup>  | 137.3(3) |
| N <sup>31</sup> | Cu <sup>1</sup> | O <sup>1</sup>   | 101.12(10) | N <sup>7</sup>  | C <sup>4</sup> | O <sup>5</sup>  | 112.5(3) |
| O <sup>1</sup>  | Cu <sup>1</sup> | O <sup>111</sup> | 177.05(9)  | N <sup>3</sup>  | C <sup>1</sup> | O <sup>9</sup>  | 110.2(3) |
| C <sup>2</sup>  | O <sup>9</sup>  | C <sup>1</sup>   | 102.9(2)   | N <sup>3</sup>  | C <sup>1</sup> | N <sup>2</sup>  | 137.5(3) |
| C <sup>3</sup>  | O <sup>5</sup>  | C <sup>4</sup>   | 102.9(2)   | N <sup>2</sup>  | C <sup>1</sup> | O <sup>9</sup>  | 112.3(3) |
| N <sup>1</sup>  | O <sup>11</sup> | Cu <sup>12</sup> | 134.4(2)   | O <sup>5</sup>  | C <sup>3</sup> | C <sup>2</sup>  | 119.3(3) |
| N <sup>5</sup>  | N <sup>6</sup>  | Cu <sup>1</sup>  | 121.4(2)   | N <sup>5</sup>  | C <sup>3</sup> | O <sup>5</sup>  | 114.2(3) |
| C <sup>4</sup>  | N <sup>6</sup>  | Cu <sup>1</sup>  | 129.8(2)   | N <sup>5</sup>  | C <sup>3</sup> | C <sup>2</sup>  | 126.5(3) |
| C <sup>4</sup>  | N <sup>6</sup>  | N <sup>5</sup>   | 107.8(2)   | O <sup>9</sup>  | C <sup>2</sup> | C <sup>3</sup>  | 117.1(3) |
| C <sup>3</sup>  | N <sup>5</sup>  | N <sup>6</sup>   | 104.9(3)   | N <sup>4</sup>  | C <sup>2</sup> | O <sup>9</sup>  | 114.5(3) |
| N <sup>4</sup>  | N <sup>3</sup>  | Cu <sup>12</sup> | 121.1(2)   | N <sup>4</sup>  | C <sup>2</sup> | C <sup>3</sup>  | 128.3(3) |
| C <sup>1</sup>  | N <sup>3</sup>  | Cu <sup>12</sup> | 130.3(2)   |                 |                |                 |          |

### 3. Morphologies of the samples prepared under different conditions

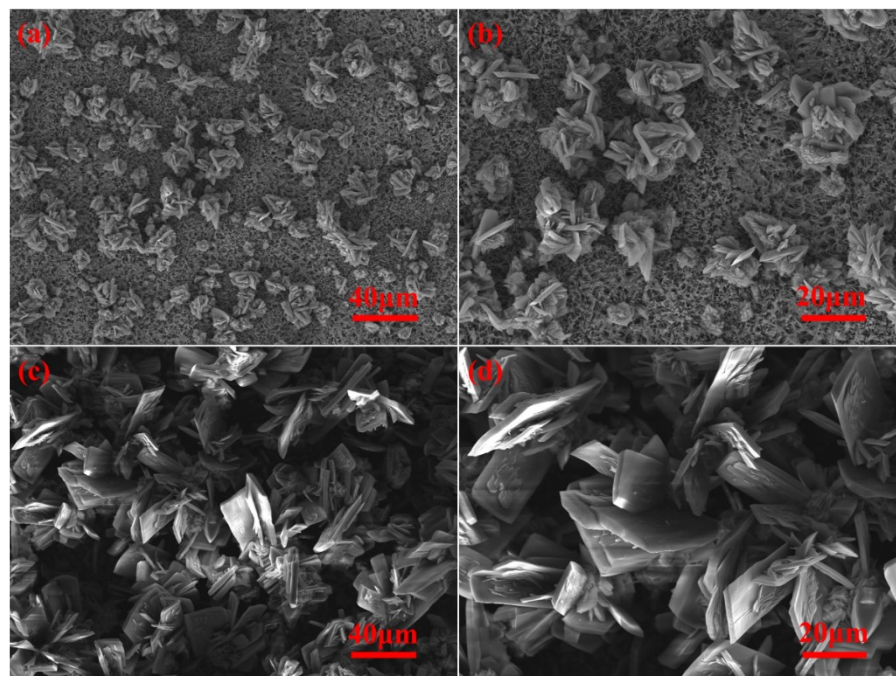

Fig. S2 (a) and (b) represent low and high magnification SEM images of  $[\text{Cu}(\text{BODN})\cdot 5\text{H}_2\text{O}]_n$  arrays prepared by reaction for 5 min, (c) and (d) represent low and high magnification SEM images of  $[\text{Cu}(\text{BODN})\cdot 5\text{H}_2\text{O}]_n$  arrays prepared by reaction for 20 min.

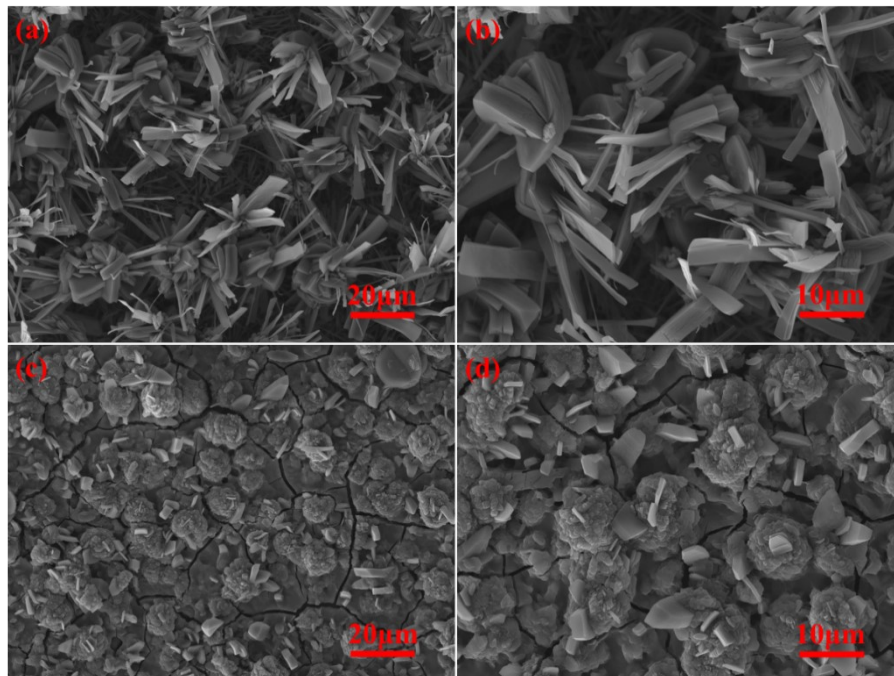

Fig. S3 (a) and (b) represent the low and high magnification SEM images of  $[\text{Cu}(\text{BODN})\cdot 5\text{H}_2\text{O}]_n$  arrays prepared at a solution concentration of  $2 \text{ g}\cdot\text{L}^{-1}$ , (c) and (d) represent the low and high magnification SEM images of  $[\text{Cu}(\text{BODN})\cdot 5\text{H}_2\text{O}]_n$  arrays prepared at a solution concentration of  $6 \text{ g}\cdot\text{L}^{-1}$ .

#### 4. The TG curve of $[\text{Cu}(\text{BODN})\cdot 5\text{H}_2\text{O}]_n$ crystals

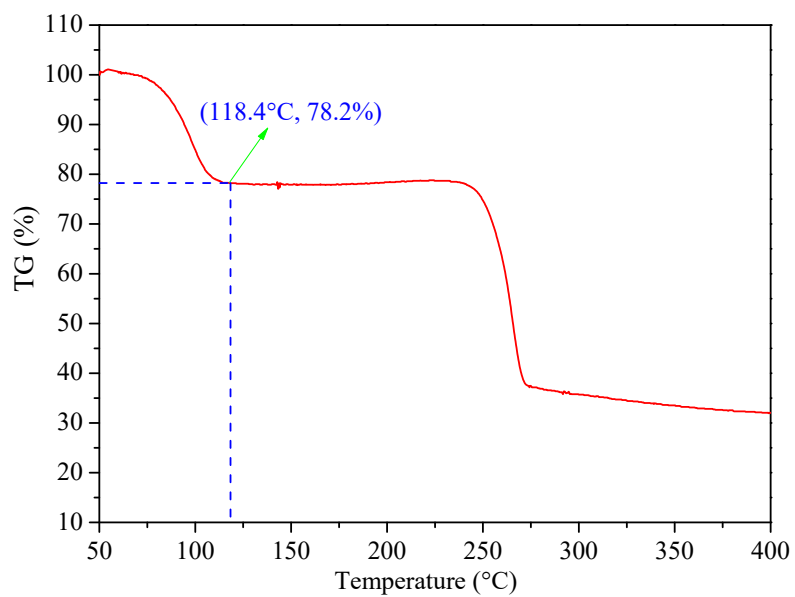

Fig. S4 The TG curve of  $[\text{Cu}(\text{BODN})\cdot 5\text{H}_2\text{O}]_n$  crystals

## 5. The composition of energetic films estimated by the heat releases

Table S3 The composition of energetic films estimated by the heat releases

| Samples                                                      | Cu(OH) <sub>2</sub><br>(%) | [Cu(BODN)·5H <sub>2</sub> O] <sub>n</sub><br>(%) | Al<br>(%) | Nitrocellulose<br>(%) |
|--------------------------------------------------------------|----------------------------|--------------------------------------------------|-----------|-----------------------|
| [Cu(BODN)·5H <sub>2</sub> O] <sub>n</sub> arrays (5 min)     | 34.6                       | 65.4                                             | --        | --                    |
| [Cu(BODN)·5H <sub>2</sub> O] <sub>n</sub> arrays (10 min)    | 0                          | 100                                              | --        | --                    |
| [Cu(BODN)·5H <sub>2</sub> O] <sub>n</sub> @nano-Al (2 drops) | --                         | 86.2                                             | 11.7      | 2.1                   |
| [Cu(BODN)·5H <sub>2</sub> O] <sub>n</sub> @nano-Al (6 drops) | --                         | 72.1                                             | 23.7      | 4.2                   |
